# Supplementary material for: Effect of ammonia on fine-particle pH in agricultural regions of China: comparison between urban and rural sites
Source: Copernicus journal article supplement (doi:10.5194/acp-20-2719-2020), 2020-03-05
Supplement: Supplementary file 1 [file acp-20-2719-2020-supplement.pdf]

Supplement of Atmos. Chem. Phys., 20, 2719–2734, 2020  
<https://doi.org/10.5194/acp-20-2719-2020-supplement>  
© Author(s) 2020. This work is distributed under  
the Creative Commons Attribution 4.0 License.

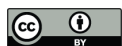

*Supplement of*

## **Effect of ammonia on fine-particle pH in agricultural regions of China: comparison between urban and rural sites**

**Shenbo Wang et al.**

*Correspondence to:* Shasha Yin ([shashayin@zzu.edu.cn](mailto:shashayin@zzu.edu.cn)) and Ruiqin Zhang ([rqzhang@zzu.edu.cn](mailto:rqzhang@zzu.edu.cn))

The copyright of individual parts of the supplement might differ from the CC BY 4.0 License.

22 **Text S1 Calculation of ions balance and equivalent ratio.**

23 **Text S2 Backward trajectory frequency analysis**

24 **Text S3 NH<sub>x</sub> calculation**

25

26

27 **Text S1 Calculation of ions balance and equivalent ratio.**

28 The ions balance and equivalent ratio are calculated using the following formulas:

29 
$$[\text{cations}] = \frac{[\text{NH}_4^+]}{18} + \frac{[\text{Na}^+]}{23} + \frac{[\text{K}^+]}{39} + \frac{[\text{Ca}^{2+}]}{20} + \frac{[\text{Mg}^{2+}]}{12} \quad (1)$$

30 
$$[\text{anions}] = \frac{[\text{SO}_4^{2-}]}{48} + \frac{[\text{NO}_3^-]}{62} + \frac{[\text{Cl}^-]}{35.5} \quad (2)$$

31 
$$\text{ion balance} = [\text{cations}] - [\text{anions}] \quad (3)$$

32 
$$\text{equivalent ratio} = [\text{cations}]/[\text{anions}] \quad (4)$$

33 where [Na<sup>+</sup>], [K<sup>+</sup>], [Ca<sup>2+</sup>], [Mg<sup>2+</sup>], [NH<sub>4</sub><sup>+</sup>], [SO<sub>4</sub><sup>2-</sup>], [NO<sub>3</sub><sup>-</sup>], and [Cl<sup>-</sup>] are the measured concentrations  
34 (μg/m<sup>3</sup>) in the atmosphere. In addition to the measurement uncertainties, equivalent ratios lower than  
35 1 might be attributed to the loss of cations from the volatilization of ammonium and unmeasured  
36 hydrogen ions (Meng et al., 2016). Equivalent ratios higher than 1 were most likely caused by water-  
37 soluble organic anions, CO<sub>3</sub><sup>2-</sup> and HCO<sub>3</sub><sup>-</sup> contents that were not detected in chemical analysis (Tian et  
38 al., 2018).

39

40 **Text S2 Backward trajectory frequency analysis**

41 The Hybrid Single-Particle Lagrangian Integrated Trajectory (HYSPLIT) Web version of the  
42 National Oceanic and Atmospheric Administration Air Resources Laboratory (Stein et al., 2015) was

43 used to calculate backward trajectories from gridded meteorological data (at 500 m above ground level)  
44 at regular time intervals (12 h). For modeling the trajectory frequency, the system will start a trajectory  
45 from a single location and height every 6 hours and then sum the frequency that the trajectory passed  
46 over a grid cell and then normalize by either the total number of trajectories or endpoints. The grid  
47 resolution was selected as 1° according to the scale of the desired result. The frequency distribution  
48 maps (Fig. S7) of the five sampling sites recorded during the three cases support our findings: the  
49 southern regions of Henan Province (e.g., Xuchang and Zhumadian cities) were a high probability (>  
50 20 %) source for the five sites during Case 1 (Fig. S7a); the trajectory frequency during Case 2 (Fig.  
51 S7b) uniformly distributed around the receptor sites is most probably connected to local emissions;  
52 and the five sites during Case 3 (Fig. S7c) were affected by the air masses from northeastern areas  
53 (e.g., Dezhou and Liao Cheng cities) with the frequencies higher than 20 %.

54

### 55 **Text S3 NH<sub>x</sub> calculation**

56 With respect to measurements of semi-volatile gases, the concentrations of NH<sub>3</sub> were extremely  
57 higher than HNO<sub>3</sub> and HCl, consistent with the Song et al. (2018) and Liu et al. (2017). TNH<sub>x</sub>, required  
58 NH<sub>x</sub> (Required-NH<sub>x</sub>), and excess NH<sub>x</sub> (Excess-NH<sub>x</sub>) concentrations were calculated using the  
59 following formulas:

$$60 \quad \text{Total NH}_x = 17 \times \left( \frac{[\text{NH}_4^+]}{18} + \frac{[\text{NH}_3]}{17} \right), \quad (5)$$

$$\text{Required NH}_x = 17 \times \left( \frac{[\text{SO}_4^{2-}]}{48} + \frac{[\text{NO}_3^-]}{63} + \frac{[\text{Cl}^-]}{35.5} + \frac{[\text{HNO}_3]}{64} + \frac{[\text{HCl}]}{36.5} \right) - 17 \times \left( \frac{[\text{Na}^+]}{23} + \frac{[\text{K}^+]}{39} + \frac{[\text{Ca}^{2+}]}{20} + \frac{[\text{Mg}^{2+}]}{12} \right), \quad (6)$$

$$\text{Excess NH}_x = \text{total NH}_x - \text{required NH}_x, \quad (7)$$

63 where  $[\text{Na}^+]$ ,  $[\text{K}^+]$ ,  $[\text{Ca}^{2+}]$ ,  $[\text{Mg}^{2+}]$ ,  $[\text{NH}_4^+]$ ,  $[\text{SO}_4^{2-}]$ ,  $[\text{NO}_3^-]$ ,  $[\text{Cl}^-]$ ,  $[\text{NH}_3]$ ,  $[\text{HNO}_3]$ , and  $[\text{HCl}]$  are the  
 64 measured mass concentrations ( $\mu\text{g}/\text{m}^3$ ) of these species. Excess- $\text{NH}_x$  in this study represents a part of  
 65  $\text{TNH}_x$  (gas  $\text{NH}_3$  + particle  $\text{NH}_4^+$ ), while the other  $\text{NH}_x$  plus nonvolatile cations have been equivalent  
 66 to all anions (Blanchard et al., 2000). If Excess- $\text{NH}_x$  is above 0, then the system is considered  $\text{NH}_x$ -  
 67 rich. Otherwise, the system is under the  $\text{NH}_x$ -poor condition.

68

69 **Figure lists:**

70 Fig. S1 Locations of the five monitoring stations in Henan Province, China (i.e., urban sites at  
 71 Zhengzhou (U-ZZ) and Anyang (U-AY), rural sites at Anyang (R-AY), Xinxiang (R-XX), and Puyang  
 72 (R-PY)). © 2019 National Geomatics Center of China. All rights reserved.

73 Fig. S2 Comparison between the predicted and measured  $\text{NH}_4^+$ ,  $\text{NO}_3^-$ ,  $\text{Cl}^-$ ,  $\text{NH}_3$ ,  $\text{HNO}_3$  and  $\text{HCl}$  at the  
 74 five sites.

75 Fig. S3 Ion balance of water-soluble inorganic ions at the five sites.

76 Fig. S4 Comparison between the predicted and input  $\text{NH}_4^+$  (a, d) and  $\text{NH}_3$  (b, c) concentrations, the  
 77 original and adjusted pH (c, f) of U-ZZ and R-PY sites after adjusting the measured  $\text{NH}_4^+$   
 78 concentrations to fit the ion balance.

79 Fig. S5 Comparison of predicted pH by ISORROPIA-II with E-AIM IV at the U-ZZ site.

80 Fig. S6 Temporal variations of temperature (T), relative humidity (RH), wind speed (WS), wind  
 81 direction (WD), and concentrations of  $\text{NH}_3$ ,  $\text{NH}_4^+$ ,  $\text{SO}_4^{2-}$ , and  $\text{NO}_3^-$  during three cases at U-AY (a), R-

82 AY (b), R-XX (c), and R-PY (d) sites. The shaded areas represent the measurement uncertainties.

83 Fig. S7 Trajectory frequencies of typical periods at the five sites during Cases 1(a), 2(b), and 3(c).

84 The color scale bar represents the percentage of trajectories passing through each grid to total

85 trajectories.

86 Fig. S8 Time series of predicted  $PM_{2.5}$  pH at the five sites. The shaded areas show the range of

87 uncertainty in pH for the  $pH_{max}$  and  $pH_{min}$  calculations.

88 Fig. S9 Correlations between pH and  $H^+_{air}$  during sampling periods at the five sites. The color scale

89 bar represents the aerosol water content (AWC) concentration.

90 Fig. S10 Sensitivity tests of  $PM_{2.5}$  pH to input data. The real-time measured values of a variable and

91 the average values of other parameters during Case 2 were input into the ISORROPIA II model.

92 Fig. S11 Comparisons of the sensitivities of  $PM_{2.5}$  pH to TNa,  $K^+$ ,  $Ca^{2+}$ , and  $Mg^{2+}$  among the five sites.

93 The color scale bar represents the pH values. The relative standard deviation (RSD) and range (Range)

94 represent the sensitivity degree of pH to this variable and range (min–max) of the re-predicted pH

95 value in the test, respectively.

96

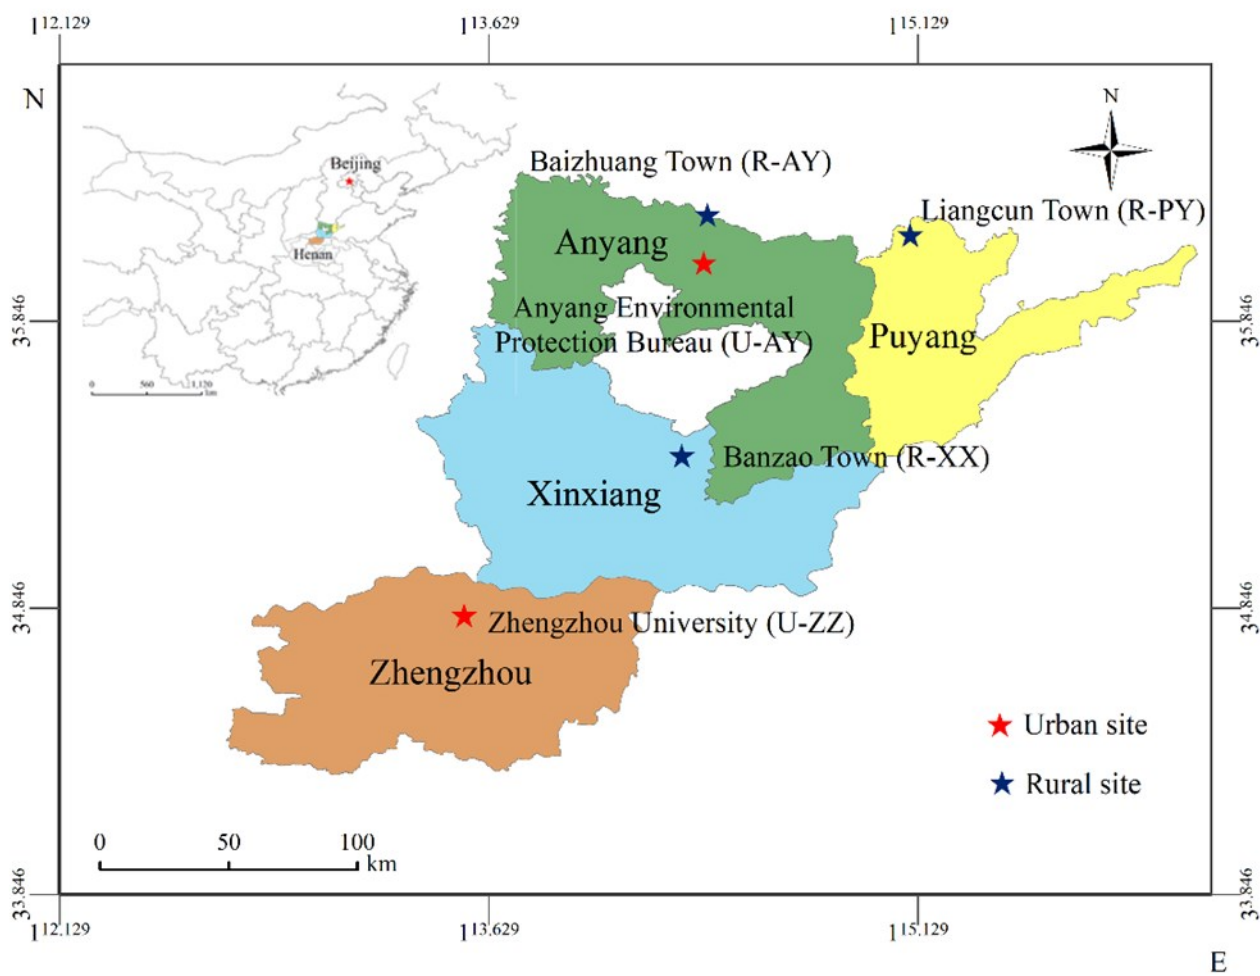

97

98 Fig. S1 Locations of the five monitoring stations in Henan Province, China (i.e., urban sites at  
 99 Zhengzhou (U-ZZ) and Anyang (U-AY), rural sites at Anyang (R-AY), Xinxiang (R-XX), and Puyang  
 100 (R-PY)). © 2019 National Geomatics Center of China. All rights reserved.

101

102

103

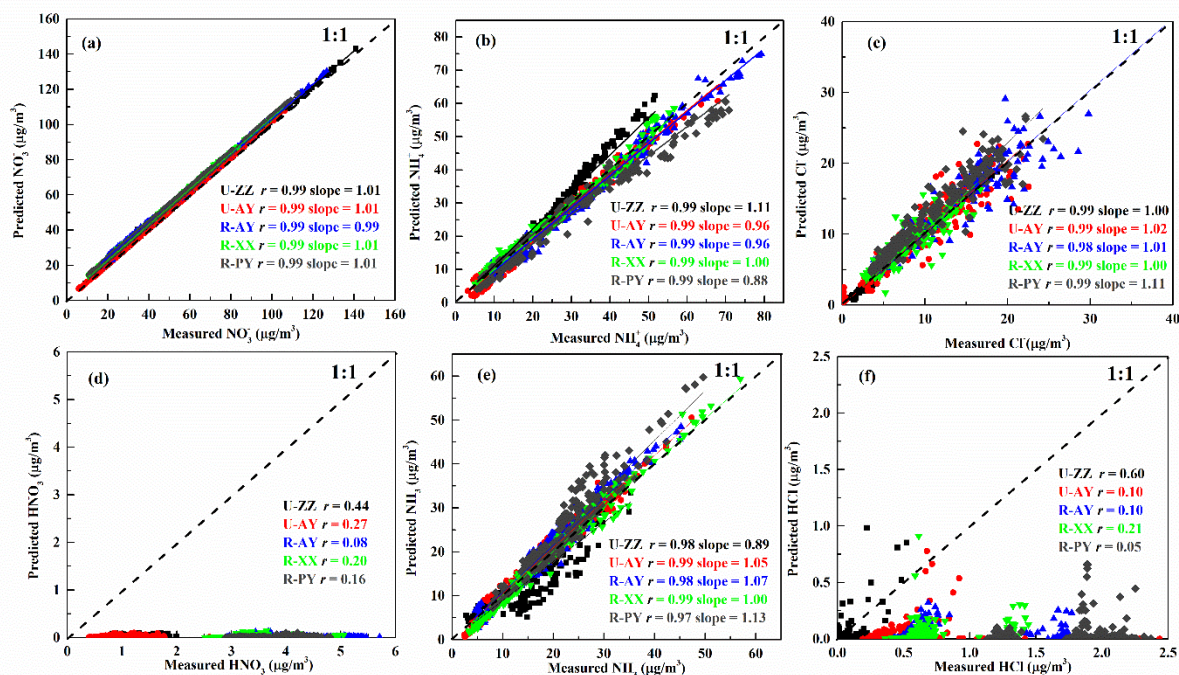

104

105 Fig. S2 Comparison between the predicted and measured  $\text{NH}_4^+$ ,  $\text{NO}_3^-$ ,  $\text{Cl}^-$ ,  $\text{NH}_3$ ,  $\text{HNO}_3$  and  $\text{HCl}$  at the

106 five sites.

107

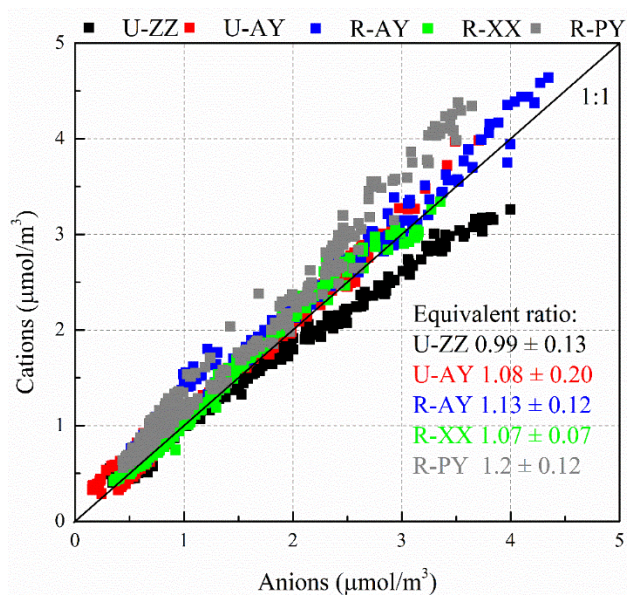

108

109 Fig. S3 Ion balance of water-soluble inorganic ions at the five sites.



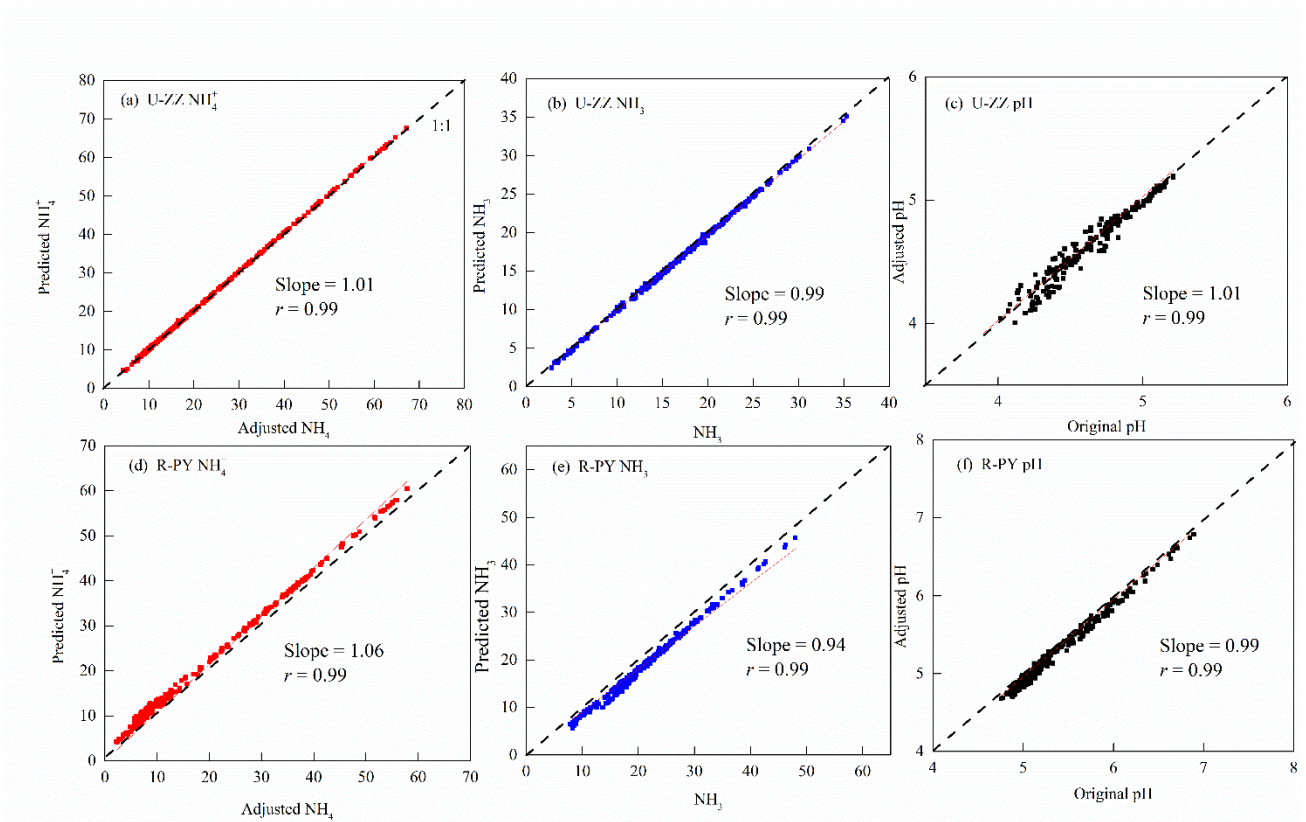

110

111 Fig. S4 Comparison between the predicted and input  $\text{NH}_4^+$  (a, d) and  $\text{NH}_3$  (b, c) concentrations, the  
 112 original and adjusted pH (c, f) of U-ZZ and R-PY sites after adjusting the measured  $\text{NH}_4^+$   
 113 concentrations to fit the ion balance.

114

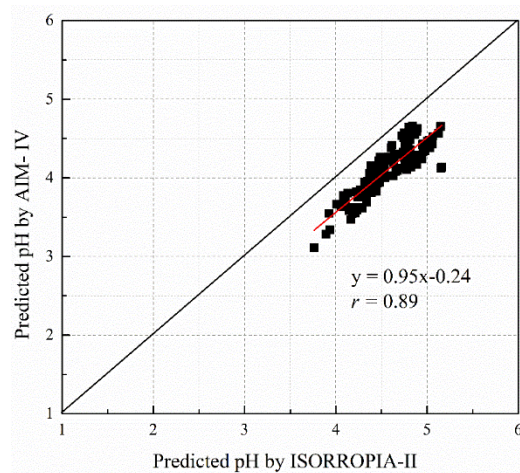

115

116 Fig. S5 Comparison of predicted pH by ISORROPIA-II with E-AIM IV at the U-ZZ site.



117

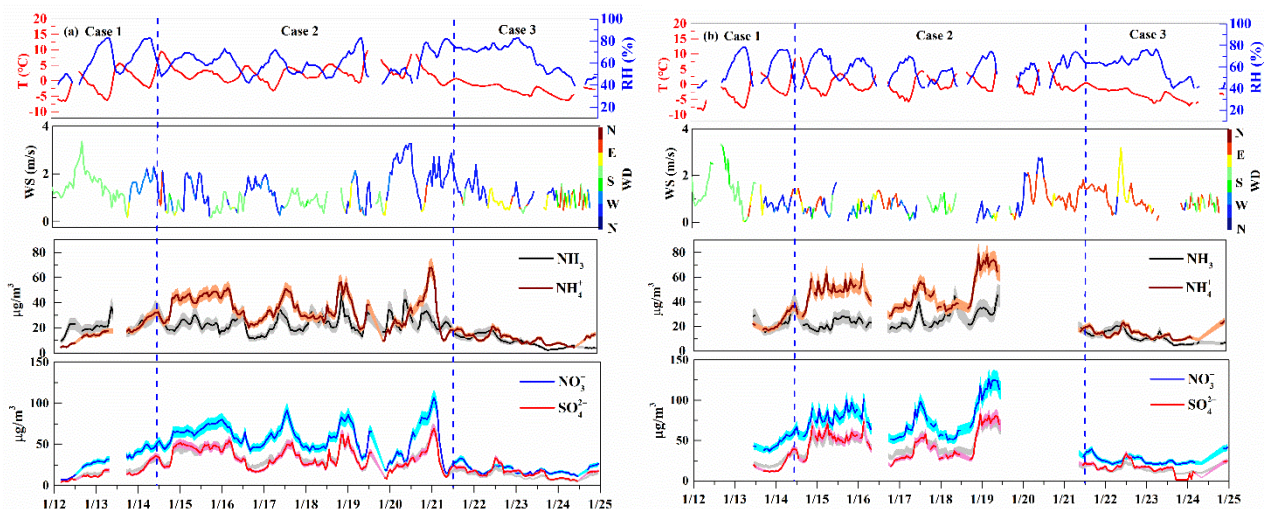

118

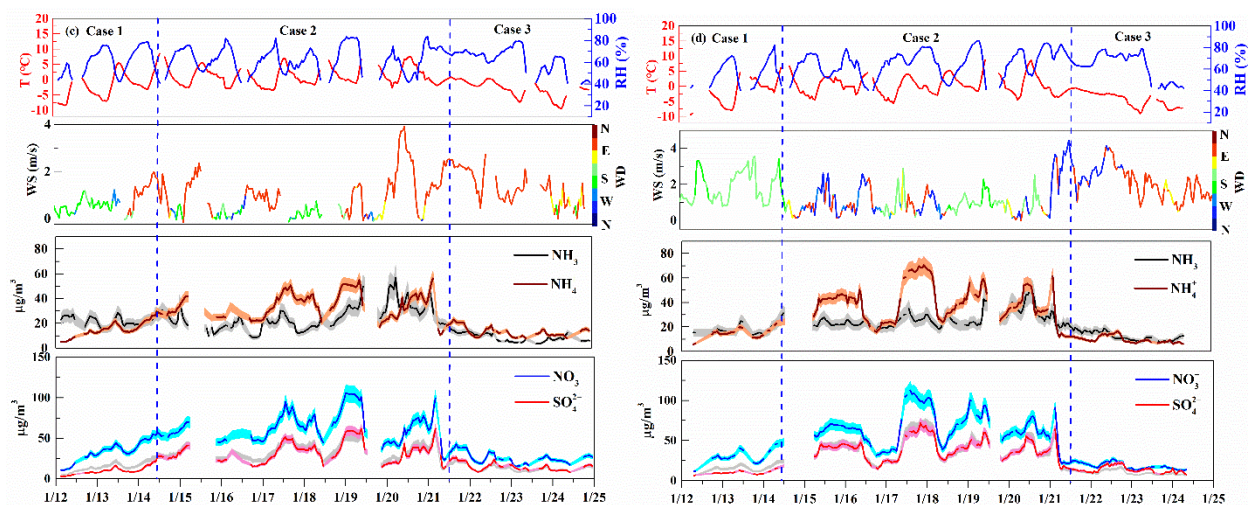

119 Fig. S6 Temporal variations of temperature (T), relative humidity (RH), wind speed (WS), wind  
 120 direction (WD), and concentrations of  $\text{NH}_3$ ,  $\text{NH}_4^+$ ,  $\text{SO}_4^{2-}$ , and  $\text{NO}_3^-$  during three cases at U-AY (a), R-  
 121 AY (b), R-XX (c), and R-PY (d) sites. The shaded areas represent the measurement uncertainties.

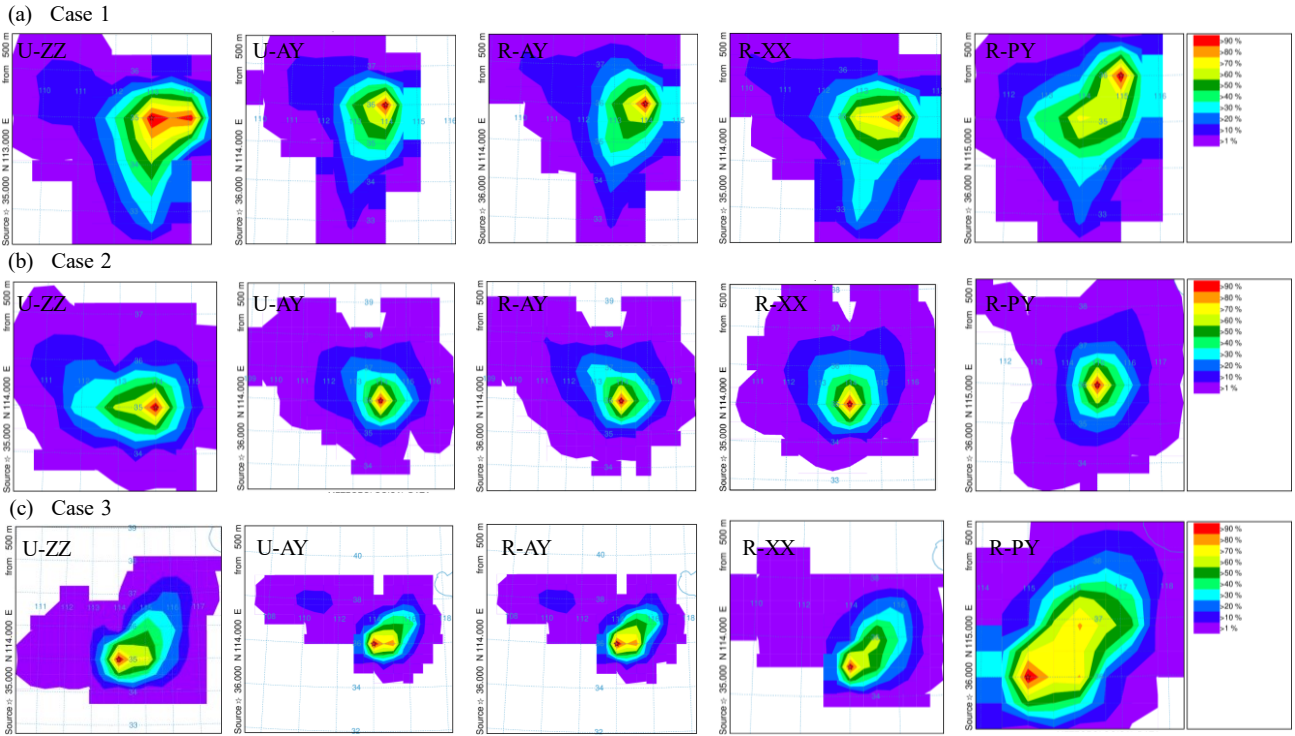

122

123 Fig. S7 Trajectory frequencies of typical periods at the five sites during Cases 1(a), 2(b), and 3(c).

124 The color scale bar represents the percentage of trajectories passing through each grid to total

125 trajectories.

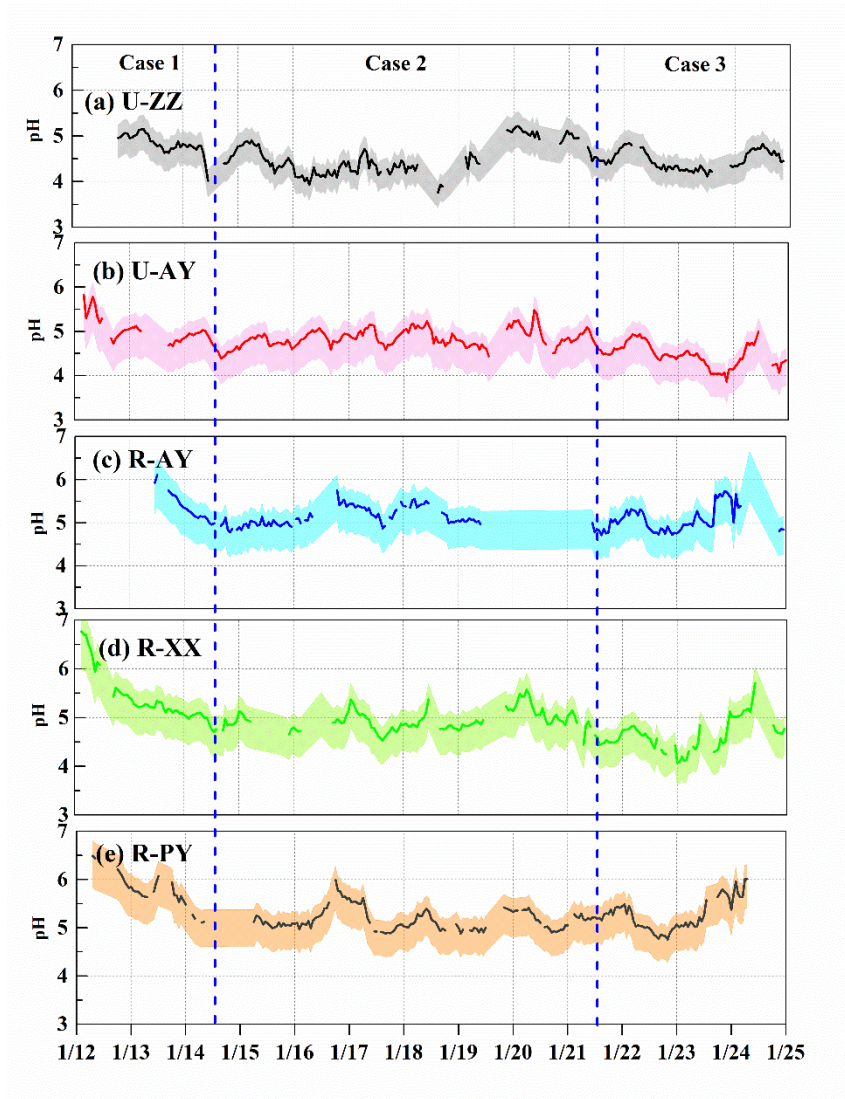

126

127 Fig. S8 Time series of predicted  $PM_{2.5}$  pH at the five sites. The shaded areas show the range of  
 128 uncertainty in pH for the  $pH_{max}$  and  $pH_{min}$  calculations.

129



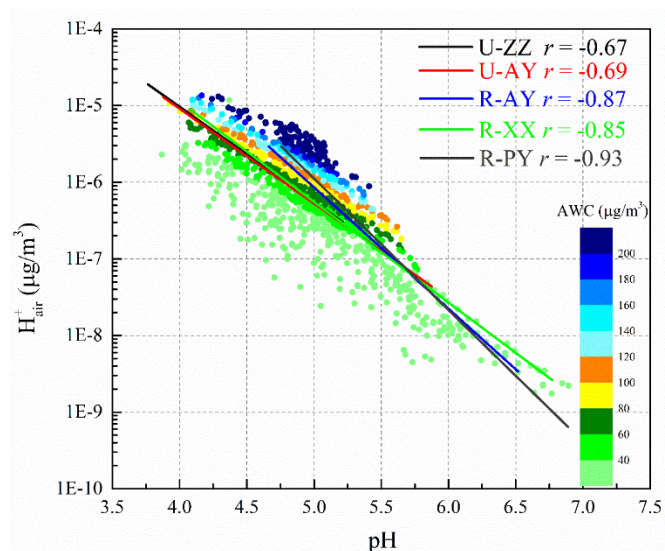

130

131 Fig. S9 Correlations between pH and  $H^+_{\text{air}}$  during sampling periods at the five sites. The color scale

132 bar represents the aerosol water content (AWC) concentration.

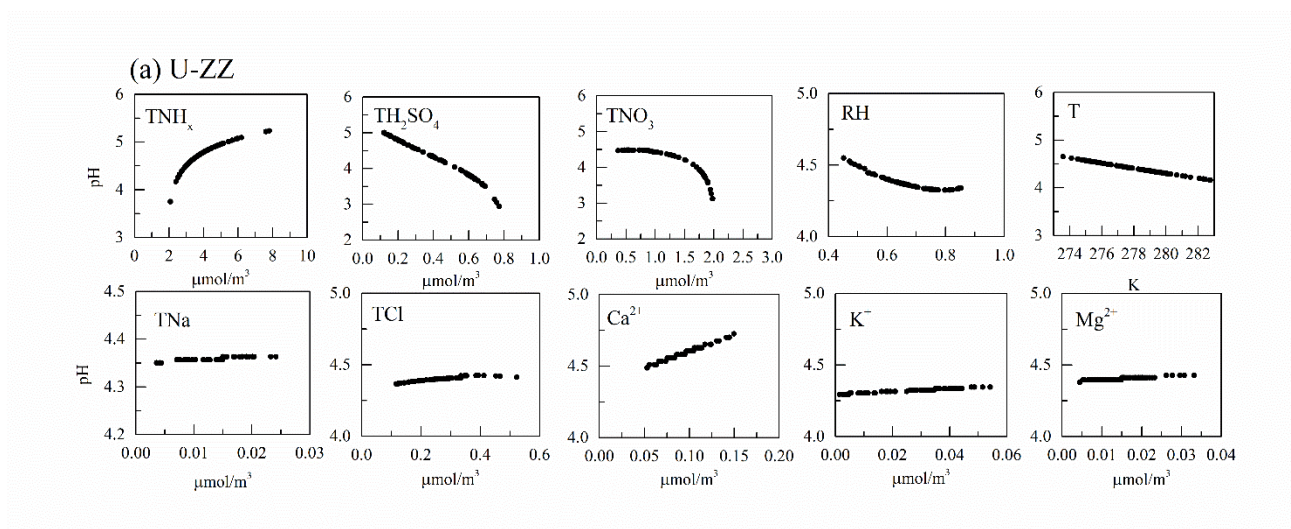

133

134

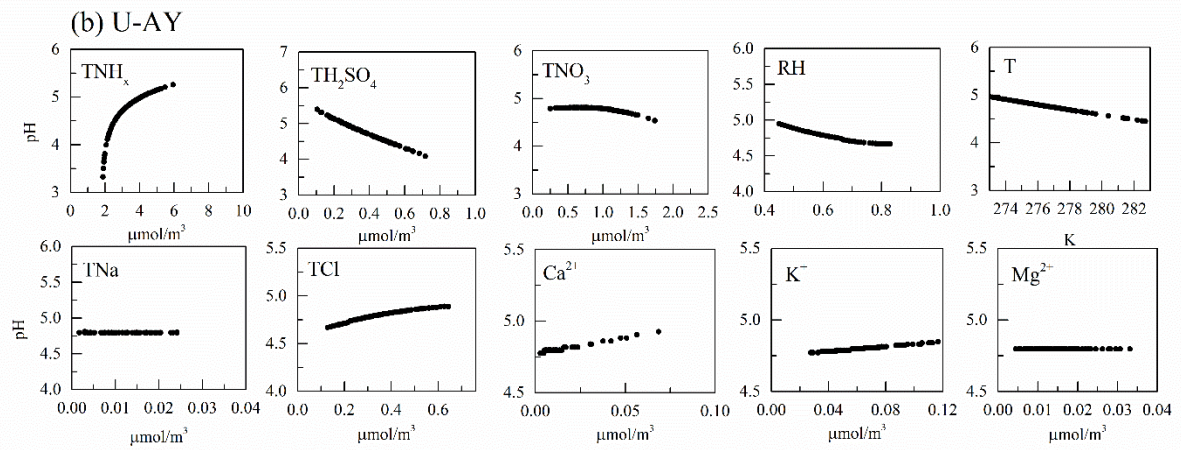

135

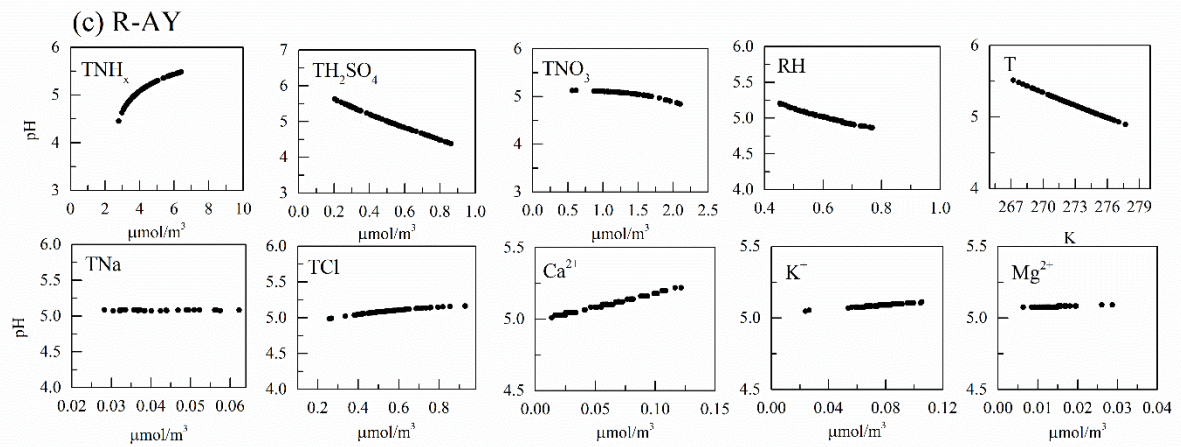

136

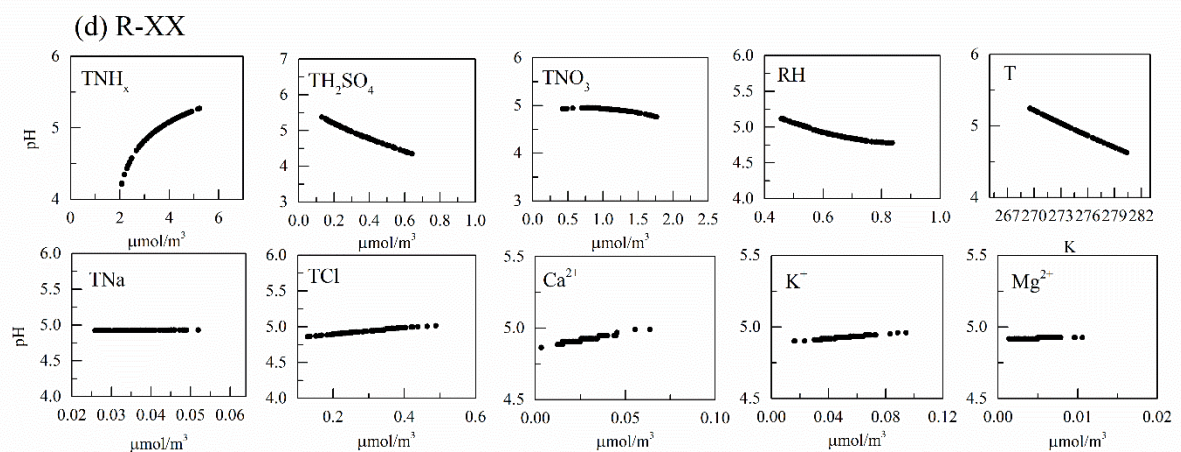



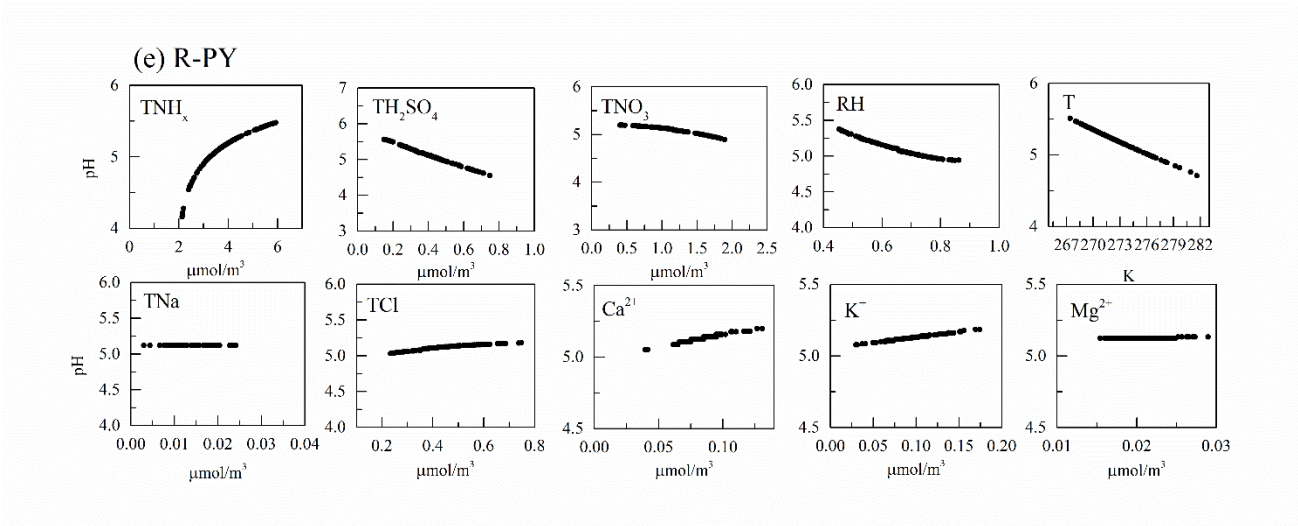

137

138 Fig. S10 Sensitivity tests of PM<sub>2.5</sub> pH to input data. The real-time measured values of a variable and  
 139 the average values of other parameters during Case 2 were input into the ISORROPIA II model.

140

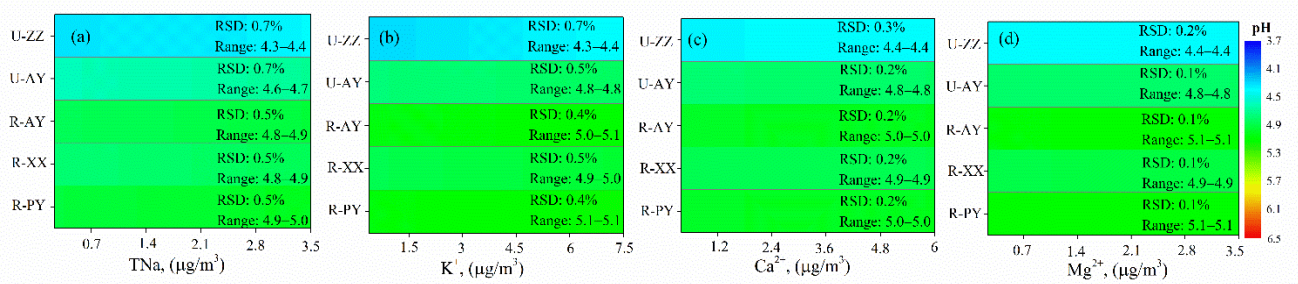

141

142 Fig. S11 Comparisons of the sensitivities of PM<sub>2.5</sub> pH to TNa (replaced by observed Na<sup>+</sup>), K<sup>+</sup>, Ca<sup>2+</sup>,  
 143 and Mg<sup>2+</sup> among the five sites. The color scale bar represents the pH values. The relative standard  
 144 deviation (RSD) and range (Range) represent the sensitivity degree of pH to this variable and range  
 145 (min–max) of the re-predicted pH value in the test, respectively.

146

147

148

149

150

151

152 **Table lists:**

153 Table S1 Summarized NH<sub>3</sub> concentrations (μg/m<sup>3</sup>) in this study and other sites.

154 Table S2 Statistical values of pH during three cases.

155 Table S3 Pearson's correlation coefficients (*r*) between H<sup>+</sup><sub>air</sub> with observed data at the five sites.

156 Table S4 Variation ranges of each variable for assessing the different effects of this variable among

157 five sites and their observed minimum and maximum values.

158

159

160 Table S1 Summarized NH<sub>3</sub> concentrations (μg/m<sup>3</sup>) in this study and other sites.

| Cities                   | Period          | NH <sub>3</sub> | References         |
|--------------------------|-----------------|-----------------|--------------------|
| Zhengzhou, China         | 2018.01         | 22.0 ± 8.9      | This study         |
| Anyang, China            | 2018.01         | 25.3 ± 10.5     | This study         |
| Anyang, China            | 2018.01         | 25.8 ± 12.0     | This study         |
| Xinxiang, China          | 2018.01         | 26.1 ± 14.0     | This study         |
| Puyang, China            | 2018.01         | 27.1 ± 17.3     | This study         |
| Zhengzhou, China         | 2017.03–2018.04 | 11.7            | Wang et al., 2018  |
| Beijing, China           | 2015.01–03      | 7.3             | Zhang et al., 2018 |
| Beijing, China           | 2008.02–2010.07 | 22.8 ± 16.3     | Wang et al., 2018  |
| Beijing, China           | 2007.01–2010.07 | 10.2 ± 10.8     | Wang et al., 2018  |
| Beijing, China           | 2001.07–2001.08 | 16.8–42.2       | Wang et al., 2018  |
| North China Plain, China | 2006.08–2009.09 | 11.7–31.9       | Shen et al., 2011  |
| Xi'an, China             | 2006.04–2007.04 | 18.6            | Wang et al., 2018  |
| Xi'an, China             | 2006.04–2007.04 | 20.3            | Wang et al., 2018  |
| Chengdu, China           | 2014.07–2015.04 | 10.5 ± 4.8      | Wang et al., 2016  |
| Wanzhou, China           | 2014.07–2015.04 | 8.3 ± 4.7       | Wang et al., 2016  |



|                  |                 |            |                        |
|------------------|-----------------|------------|------------------------|
| shanghai, China  | 2014.05–2015.06 | 7.8        | Chang et al., 2019     |
| Hangzhou, China  | 2012.04–05      | 12.8       | Jansen et al., 2014    |
| Dalian, China    | 2010.09–2012.04 | 1.5        | Luo et al., 2014       |
| Fenghua, China   | 2010.08–2012.05 | 3.7        | Luo et al., 2014       |
| Fujian, China    | 2015.06–2016.05 | 21.0 ± 7.9 | Wang et al., 2018      |
| Fujian, China    | 2015.06–2017.03 | 10.5–13.5  | Wu et al., 2018        |
| Hong Kong, China | 2003.10–2006.05 | 10.2       | Tanner, 2009           |
| Carolina, USA    | 2000.01–12      | 0.4–3.4    | Walker et al., 2004    |
| Delhi, India     | 2013.01–2015.12 | 25.3 ± 4.6 | Saraswati et al., 2019 |

---

Table S2 Statistical values of pH during three cases.

|      | Case 1          |        |                 |         | Case 2          |        |                 |         | Case 3          |        |                 |         |
|------|-----------------|--------|-----------------|---------|-----------------|--------|-----------------|---------|-----------------|--------|-----------------|---------|
|      | 25th percentile | Median | 75th percentile | Average | 25th percentile | Median | 75th percentile | Average | 25th percentile | Median | 75th percentile | Average |
| U-ZZ | 4.7             | 4.8    | 5.0             | 4.8     | 4.3             | 4.5    | 4.8             | 4.5     | 4.3             | 4.5    | 4.7             | 4.5     |
| U-AY | 4.8             | 5.0    | 5.2             | 5.1     | 4.7             | 4.8    | 5.0             | 4.8     | 4.4             | 4.5    | 4.8             | 4.5     |
| R-AY | 5.1             | 5.4    | 5.8             | 5.5     | 5.0             | 5.1    | 5.4             | 5.2     | 4.9             | 5.0    | 5.3             | 5.1     |
| R-XX | 5.1             | 5.3    | 5.6             | 5.4     | 4.8             | 4.9    | 5.1             | 4.9     | 4.5             | 4.7    | 5.0             | 4.7     |
| R-PY | 5.7             | 6.0    | 6.3             | 6.0     | 5.0             | 5.1    | 5.4             | 5.2     | 5.0             | 5.2    | 5.4             | 5.3     |

165 Table S3 Pearson's correlation coefficients ( $r$ ) between  $H^+_{air}$  with observed data at the five sites.

|                                 | U-ZZ    | U-AY     | R-AY    | R-XX     | R-PY    |
|---------------------------------|---------|----------|---------|----------|---------|
| TWSIIs                          | 0.834** | 0.521**  | 0.676** | 0.530**  | 0.774** |
| TNH <sub>x</sub>                | 0.650** | 0.368**  | 0.544** | 0.301**  | 0.703** |
| TH <sub>2</sub> SO <sub>4</sub> | 0.867** | 0.625**  | 0.765** | 0.638**  | 0.811** |
| TNO <sub>3</sub>                | 0.828** | 0.458**  | 0.607** | 0.502**  | 0.767** |
| TCl                             | 0.430** | 0.406**  | 0.602** | 0.223**  | 0.419** |
| K <sup>+</sup>                  | 0.757** | 0.388**  | 0.551** | 0.138*   | 0.485** |
| Ca <sup>2+</sup>                | -0.161* | -0.234** | -0.137* | -0.248** | 0.06    |
| TNa                             | 0.306** | -0.095   | 0.098   | 0.103    | -0.138* |
| Mg <sup>2+</sup>                | -0.009  | -0.027   | -0.018  | -0.050   | 0.026   |
| AWC                             | 0.63**  | 0.739**  | 0.903** | 0.755**  | 0.938** |
| T                               | 0.012   | 0.045    | -0.138* | -0.023   | 0.146*  |
| RH                              | 0.337** | 0.610**  | 0.631** | 0.637**  | 0.658** |

166 \* Correlation is significant at the 0.05 level (two-tailed).

167 \*\* Correlation is significant at the 0.01 level (two-tailed).

168

169

170 Table S4 Variation ranges of each variable for assessing the different effects of this variable among

171 five sites and their observed minimum and maximum values.

| Species                                              | Observation |       | Setting |     | Gradient                 |
|------------------------------------------------------|-------------|-------|---------|-----|--------------------------|
|                                                      | Min         | Max   | Min     | Max |                          |
| T (°C)                                               | -5.8        | 14.3  | -6      | 15  | 0.1                      |
| RH (%)                                               | 26.8        | 92.3  | 30      | 95  | 0.1                      |
| TNH <sub>x</sub> (µg/m <sup>3</sup> )                | 21.2        | 96.7  | 25      | 95  | 0.01 µmol/m <sup>3</sup> |
| TNO <sub>3</sub> (µg/m <sup>3</sup> )                | 5.8         | 132.6 | 1       | 125 | 0.01 µmol/m <sup>3</sup> |
| TH <sub>2</sub> SO <sub>4</sub> (µg/m <sup>3</sup> ) | 6.9         | 82.7  | 10      | 80  | 0.01 µmol/m <sup>3</sup> |
| TCl (µg/m <sup>3</sup> )                             | 0.54        | 39.5  | 0.35    | 35  | 0.01 µmol/m <sup>3</sup> |
| TNa (µg/m <sup>3</sup> )                             | 0.29        | 3.33  | 0.25    | 3.5 | 0.01 µmol/m <sup>3</sup> |
| K <sup>+</sup> (µg/m <sup>3</sup> )                  | 0.27        | 7.8   | 0.1     | 7.5 | 0.01 µmol/m <sup>3</sup> |
| Ca <sup>2+</sup> (µg/m <sup>3</sup> )                | 0.2         | 5.2   | 0.4     | 6   | 0.01 µmol/m <sup>3</sup> |
| Mg <sup>2+</sup> (µg/m <sup>3</sup> )                | 0.11        | 3.1   | 0.25    | 3.5 | 0.01 µmol/m <sup>3</sup> |

172 **References:**

- 173 Blanchard, C. L., P. M. Roth, S. J. Tanenbaum, S. D. Ziman, and J. H. Seinfeld: The use of ambient  
174 measurements to identify which precursor species limit aerosol nitrate formation, *J. Air Waste*  
175 *Manage. Assoc.*, 50, 2073–2084, 2000.
- 176 Chang, Y., Zou, Z., Zhang, Y., Deng, C., Hu, J., Shi, Z., Dore, A. J., Collett, J. L.: Assessing  
177 contributions of agricultural and nonagricultural emissions to atmospheric ammonia in a Chinese  
178 megacity. *Environ. Sci. Technol.*, 53, 1822–1833, 2019.
- 179 Jansen, R. C., Shi, Y., Chen, J., Hu, Y., Xu, C., Hong, S., Li, J., Zhang, M.: Using hourly measurements  
180 to explore the role of secondary inorganic aerosol in PM<sub>2.5</sub> during haze and fog in Hangzhou,  
181 China. *Adv. Atmos. Sci.*, 31, 1427–1434, 2014.
- 182 Liu, M., Song, Y., Zhou, T., Xu, Z., Yan, C., Zheng, M., Wu, Z., Hu, M., Wu, Y., Zhu, T.: Fine particle  
183 pH during severe haze episodes in northern China. *Geophys. Res. Lett.*, 44, 5213–5221, 2017.
- 184 Luo, X. S., Tang, A. H., Shi, K., Wu, L. H., Li, W. Q., Shi, W. Q., Shi, X. K., Erisman, J. W., Zhang,  
185 F., Liu, X. J.: Chinese coastal seas are facing heavy atmospheric nitrogen deposition. *Environ.*  
186 *Res. Lett.*, 9, 095007, 2014.
- 187 Meng, C. C., Wang, L. T., Zhang, F. F., Wei, Z., Ma, S. M., Ma, J., Yang, J.: Characteristics of  
188 concentrations and water-soluble inorganic ions in PM<sub>2.5</sub> in Handan City, Hebei province, China.  
189 *Atmos. Res.*, 171, 133–146, 2016.
- 190 Saraswati, Sharma, S. K., Saxena, M., Mandal, T. K.: Characteristics of gaseous and particulate  
191 ammonia and their role in the formation of secondary inorganic particulate matter at Delhi, India.  
192 *Atmos. Res.*, 218, 34–49, 2019.

193 Shen, J., Liu, X., Ying, Z., Fangmeier, A., Goulding, K., Zhang, F.: Atmospheric ammonia and  
194 particulate ammonium from agricultural sources in the North China Plain. *Atmos. Environ.*, 45,  
195 5033–5041, 2011.

196 Song, S., Gao, M., Xu, W., Shao, J., Shi, G., Wang, S., Wang, Y., Sun, Y., Mcelroy, M. B.: Fine particle  
197 pH for Beijing winter haze as inferred from different thermodynamic equilibrium models. *Atmos.*  
198 *Chem. Phys.*, 18, 7423–7438, 2018.

199 Stein, A.F., Draxler, R.R., Rolph, G.D., Stunder, B.J.B., Cohen, M.D. and Ngan, F.: NOAA's HYSPLIT  
200 atmospheric transport and dispersion modeling system. *Bull. Am. Meteorol. Soc.* 96: 2059–2077,  
201 2015.

202 Tanner, P.A.: Vehicle-related ammonia emissions in Hong Kong. *Environ. Chem. Lett.*, 7, 37–40, 2009.

203 Tian, S., Pan, Y., and Wang, Y.: Ion balance and acidity of size-segregated particles during haze  
204 episodes in urban Beijing. *Atmospheric Research* 201, 159–167, 2018.

205 Walker, J. T., Whitall, D. R., Robarge, W. P., Paerl, H. W.: Ambient ammonia and ammonium aerosol  
206 across a region of variable ammonia emission density. *Atmos. Environ.*, 38, 1235–1246, 2004.

207 Wang, C., Yin, S., Bai, L., Zhang, X., Gu, X., Zhang, H., Lu, Q., Zhang, R.: High-resolution ammonia  
208 emission inventories with comprehensive analysis and evaluation in Henan, China, 2006–2016.  
209 *Atmos. Environ.*, 193, 11–23, 2018.

210 Wang, H., Yang, F., Shi, G., Tian, M., Zhang, L., Zhang, L., Fu, C.: Ambient concentration and dry  
211 deposition of major inorganic nitrogen species at two urban sites in Sichuan Basin, China. *Environ.*  
212 *Pollut.*, 219, 235–244, 2016.

213 Wu, S., Dai, L., Wei, Y., Zhu, H., Zhang, Y., Schwab, J. J., Yuan, C.: Atmospheric ammonia

214 measurements along the coastal lines of Southeastern China: Implications for inorganic nitrogen  
215 deposition to coastal waters. *Atmos. Environ.*, 177, 1–11, 2018.

216 Zhang, R., Sun, X., Huang, Y., Shi, A., Yan, J., Nie, T., Yan, X., Li, X.: Secondary inorganic aerosols  
217 formation during haze episodes at an urban site in Beijing, China. *Atmos. Environ.*, 177, 275–  
218 282, 2018.

219

220
